# Supplementary material for: Measurement report: Sulfuric acid nucleation and experimental conditions in a photolytic flow reactor
Source: Copernicus journal article supplement (doi:10.5194/acp-21-1987-2021), 2021-02-10
Supplement: Supplementary file 1 [file acp-21-1987-2021-supplement.pdf]

Supplement of Atmos. Chem. Phys., 21, 1987–2001, 2021  
<https://doi.org/10.5194/acp-21-1987-2021-supplement>  
© Author(s) 2021. This work is distributed under  
the Creative Commons Attribution 4.0 License.

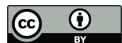

*Supplement of*

## **Measurement report: Sulfuric acid nucleation and experimental conditions in a photolytic flow reactor**

**David R. Hanson et al.**

*Correspondence to:* David R. Hanson ([hansondr@augzburg.edu](mailto:hansondr@augzburg.edu))

The copyright of individual parts of the supplement might differ from the CC BY 4.0 License.

## S1.Apparatus overview

PhoFR is a jacketed flow reactor with 5.0 cm inner diameter, with 113 cm of its length illuminated by 4 BLB fluorescent bulbs. Most gas inlets are located in a conical region partitioned from the main flow reactor by a Teflon mesh (~ 0.5 mm x 0.5 mm openings); an inlet for introducing amino-compounds to the flow is located just below this mesh. A phosphoric acid coated 80 cm length of tubing – along with a thin strip of Teflon mesh to maintain acid spreadout – was installed on the exit of the dry N<sub>2</sub> flow meter (23Aug2019). Algae accumulation inside the cooling jacket was almost completely removed (alcohol - KOH soak) in Dec2019. Neither of these actions had noticeable effects on the temporal trends in experimental results.

### S1.1 Particle counters

The second particle counter is the UCPC system used in Zollner et al. [2012] which is nearly identical to that described by Stolzenburg and McMurry [1981]. The new working conditions for this instrument presented by Kuang et al. [2012] was used for the work here: saturator temperature of 45 C, condenser temperature 10 C, condenser flow of 10 cm<sup>3</sup>/s (0.6 Lpm) and a capillary flow of 1.2 cm<sup>3</sup>/s. The 50% cutoff diameter for these UCPC conditions is ~2 nm. A transport flow of 0.3 Lpm was used for the majority of the measurements, due to limitations of the total flow in the experiment. The effect of transport flow on the UCPC count rate is shown in Fig. S1 below (the 0.6 lpm data was collected with a decreased DEG transport flow.)

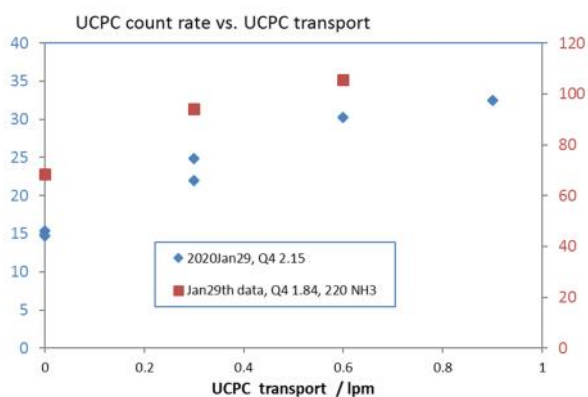

Fig. S1. Count rate (uncorrected raw numbers) of the UCPC vs. UCPC transport flow rate. Particle size was nominally 3.1 nm diameter for each set of data. Experimental conditions for red squares, Q<sub>4</sub>=1.84 sccm, 220 ppt NH<sub>3</sub> added (right axis); blue diamonds, Q<sub>4</sub>=2.15 sccm, no added NH<sub>3</sub> (left axis).

The particle counters' dependencies on operating conditions are documented for efficiencies [Stolzenburg and McMurry, 1980; Kuang et al. 2012; Kangasluomo et al., 2014] and the nano-DMA is a standard device (TSI model 3085) and the data is analyzed accordingly. We note that background count rates are monitored for every run. We have not formally calibrated either counter. In the next section is a direct comparison of them using small seed particles indicating agreement generally better than 50%.

#### S1.1.1 Comparison of N<sub>p</sub> from the two particle counters: Seed particles.

The number densities of externally generated nano-particles were monitored with both the UCPC instrument and the DEG system, the initial distribution and also with growth in PhoFR. These nano-particles are characterized by a well-defined log-normal mode and are therefore provide a good test for the calculated size-dependent counting efficiencies

of the two systems. Shown in the three plots below are the  $N_p$  for three different experiments. There is generally good agreement across the size range indicating an absence of: (i) a persistent, concerning, systematic bias between the counters and (ii) a bias in their size-dependent counting efficiencies. One set of experiments reveals a consistent bias of about plus 30 % for the UCPC data for which the cause is unknown; yet it is not to a level that is a critical concern at this time. Note that nucleated  $N_p$  for both counters was generally elevated throughout March of 2020 (see next section.)

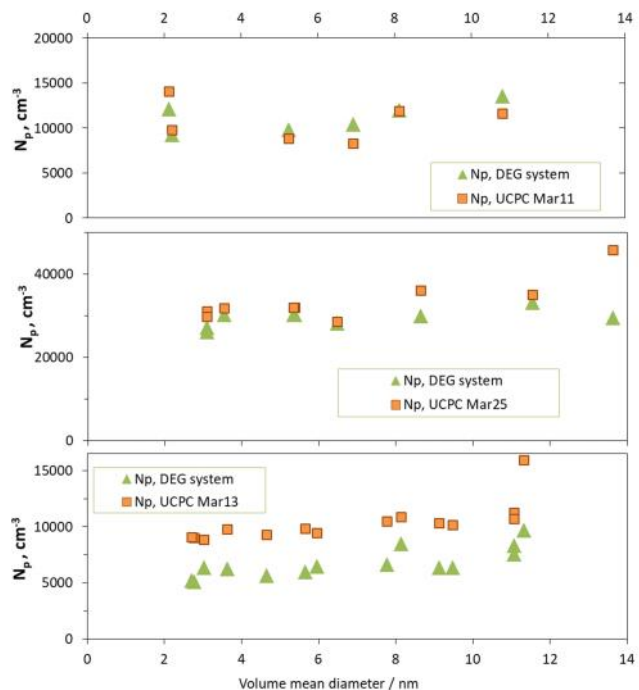

Figure S2. Variation of  $N_p$  from the two counters as a function of particle diameter. Particles were generated in a separate flow reactor and then either passed through or were grown in PhoFR with size determined by the HONO-level. See Fig S5 below for typical size distributions.

### S1.1.2 $N_p$ for UCPC and DEG over time.

The nucleation data from the two counters for  $Q_4 = 4.2$  sccm are plotted over time in Fig. S3. During March of 2020,  $N_p$  from both particle counters was elevated, the onset of which was simultaneous with a gas source change. In this month, the perturbation to the UCPC numbers was greater than that to the DEG numbers. The gas source changes in late Jan and mid-April did not initiate the same behavior in the instruments and the UCPC  $N_p$  was always lower than the DEG  $N_p$ .

We presented evidence in section 3.4 that ion-mediated processes could lead to large artifacts in the DEG  $N_p$  that the UCPC is relatively immune to. Other factors that could lead to differences in  $N_p$  from the two counters include (i) changes in how the sampling flow was split between the instruments, (ii) restricting DEG  $N_p$  to the leading edge particles, and (iii) differences in response to particles formed in episodic contamination events. For (i), the flow splits at a ¼" Swagelok tee with the UCPC sampling straight and the DEG taking its flow at right angles: early experiments showed small differences when the DEG sampled the straight leg, however, more targeted work is needed. For (ii), small particles in the DEG distributions can number as much as, or greater than, those in the leading edge. Definitive statements about counter biases due to (iii) are not possible at this time but we note that charging probabilities and activation efficiencies are two factors that can depend on particle size and composition. Nonetheless, both sets of  $N_p$  data are much lower than our previous results [Hanson et al. 2019].

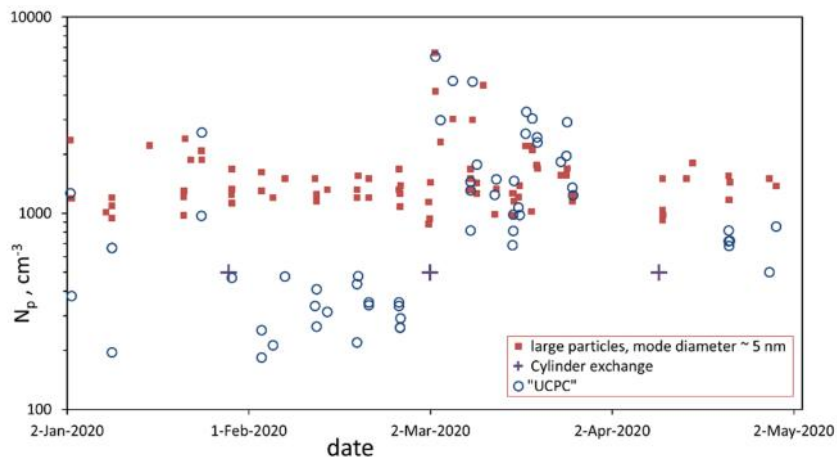

55

Fig. S3. Comparison of  $N_p$  from nucleation experiments in PhoFR for both counters over several months for  $Q_4=4.2$  sccm. The DEG  $N_p$  are plotted as red squares and UCPC  $N_p$  as circles (with + indicating cylinder changes.)

### S1.2 External particles grown in PhoFR.

60

Additional experimental results are presented here for the growth of nanoparticles introduced at the top of PhoFR as a function of  $Q_4$ , the flow through the HONO source. The particle size distribution volume-weighted diameter is plotted vs.  $Q_4$  in Figs. S4 and the particle's initial size is indicated at  $Q_4 = 0$  (determined from the lights off measurements.) Shown in Fig. S5 are the size distributions for one set of measurements.

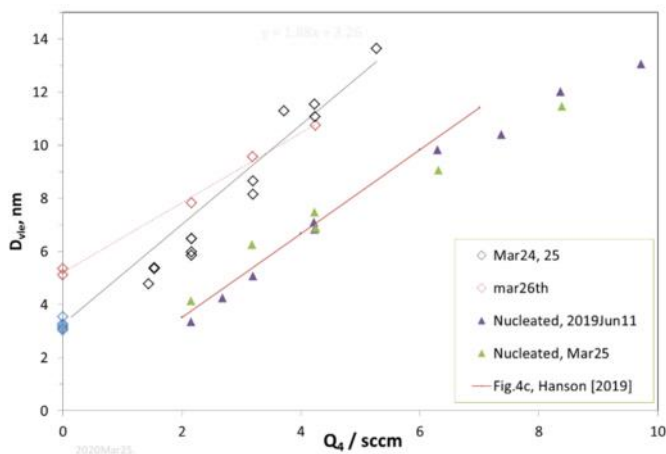

65

Fig. S4. Volume-weighted diameter of particles vs.  $Q_4$ , the HCl-laden  $N_2$  flow through the HONO source. Data at  $Q_4=0$  are the initial size of the nanoparticles (with photolysis suspended). For 2020Mar24 and 25,  $N_p$  for the seed particles was  $3 \times 10^4 \text{ cm}^{-3}$ . The growth slope (black line) is somewhat larger than the nucleation slope (red dashed line). The green and purple triangles are sizes of nucleated particles in PhoFR from 2020Mar25 and 2019Jun11. Mar 26 was with nanoparticles produced in BFR with ammonia at 1.3 ppbv. The growth slope is lower for this set of data. The nanoparticles are more numerous ( $2.6 \times 10^5 \text{ cm}^{-3}$ ) and their size distributions were not well-described by a single log-normal (see Fig. S5b).

70

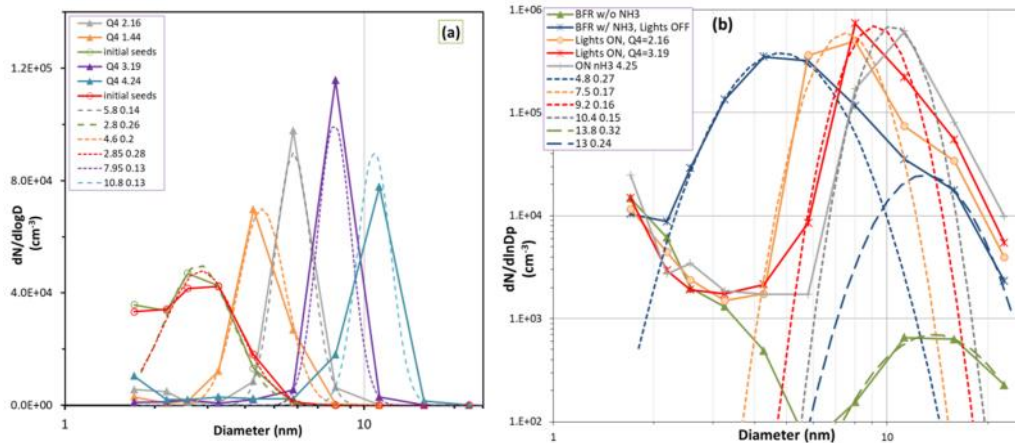

Fig. S5. Size distributions of externally-generated seed particles and after they were grown. (a) Size distributions of 24Mar2020 data at different HONO flows,  $Q_4$ , indicated in the legend along with log-normal fits and parameters; lights OFF distributions are in green and red. Seed particles generated in BFR (Glasoe et al.) with 15 ppt DMA and a very low total flow (1.5 sLpm). (b) Growth plots for 26Mar2020 with 1.3 ppb  $\text{NH}_3$  in BFR to induce seed particle formation: note the two modes. The size distribution of seed particles generated in BFR without  $\text{NH}_3$  added is also shown.

### S1.3 UCPC and DEG $N_p$ as a function of $\text{SO}_2$ .

Three sets of calculations and two sets of experimental data are shown in Fig. S6 where  $\text{SO}_2$  was varied ( $Q_1$  is flow of the 1%  $\text{SO}_2$  in air mixture) at  $Q_4 = 4.2$  sccm. The model results, using the present  $\text{NH}_3\_D52$  (aka D52octo) thermodynamics, for zero ammonia (purple line) and 25 pptv ammonia (orange line) do not describe the data very well. If a strong nucleating agent that acts like dimethylamine is present at  $10^{-16}$  mole fraction, the model results with DMA\_I free energies [Hanson et al. 2017] results best approximate the lack of a dependence on  $\text{SO}_2$  in the data.

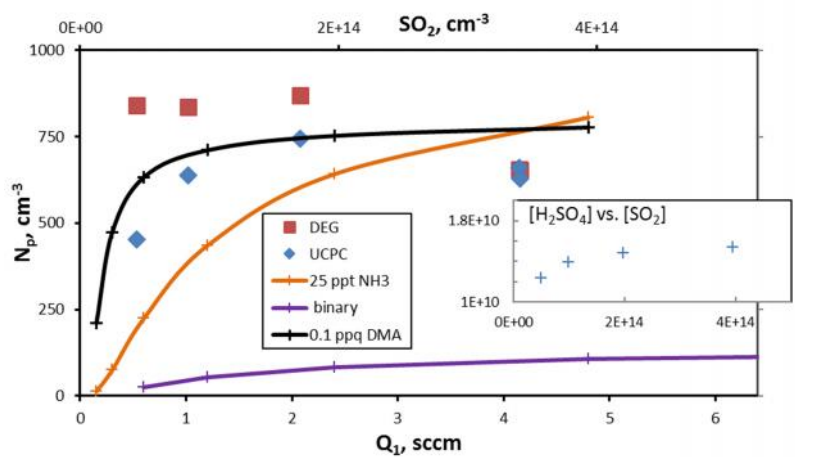

Fig. S6. Variation of  $N_p$  with  $\text{SO}_2$  mixture flow rate at  $Q_4 = 4.2$  sccm. A flow rate of 1 sccm of the 1%  $\text{SO}_2$  mixture is a number density  $[\text{SO}_2]$  of  $8.6 \times 10^{13} \text{ cm}^{-3}$ . The previous PhoFR data showed a large effect on  $\text{SO}_2$  with  $N_p$  increasing from  $7000 \text{ cm}^{-3}$  to  $30000 \text{ cm}^{-3}$  over the range of  $\text{SO}_2$  in Fig. S6. Inset shows calculated on-axis  $[\text{H}_2\text{SO}_4]$  at 120 cm as a function of  $[\text{SO}_2]$ . Calculations for binary and 25 ppt  $\text{NH}_3$  used  $\text{NH}_3\_D52$  free energies and 0.1 ppq DMA used  $\text{DMA}_I$  free energies.

### S1.4 $N_p$ and mode diameter vs. $Q_4$ over time.

Shown in Fig S7 are the leading edge particle's number density  $N_p$  and mode diameter vs.  $Q_4$ . The data has been split into four time periods to illustrate the change over time in the relationship between the measurements and  $Q_4$ . The

2018 May and June data were included in the Hanson et al. [2019] data set (a  $Q_4^{3.5}$  power relationship is shown in (a)), the 29Jun2028 to 28Sep2018 data largely overlaps the earliest data, while the Oct2018 data (red squares) departs to lower  $N_p$  at all  $Q_4$  while mode diameter seems to be a little larger than the other data. Aside from this and despite the scatter in the mode diameter data, there is not a temporal trend in particle growth over time, suggesting that HONO and NO levels were relatively constant.

We are suggesting that, since the flow reactor is believed to be cleaner than it was in early 2018, the onset of nucleation for the majority of the large particles has moved down the flow reactor to perhaps 60 cm. This would lead to less  $H_2SO_4$ -exposure and therefore less growth, about 15 %, which in principle could be discerned in the leading-edge measurements. The quadratic fits shown in Fig. S7(b) indicate there is not a change of this amount yet the scatter of the data is large.

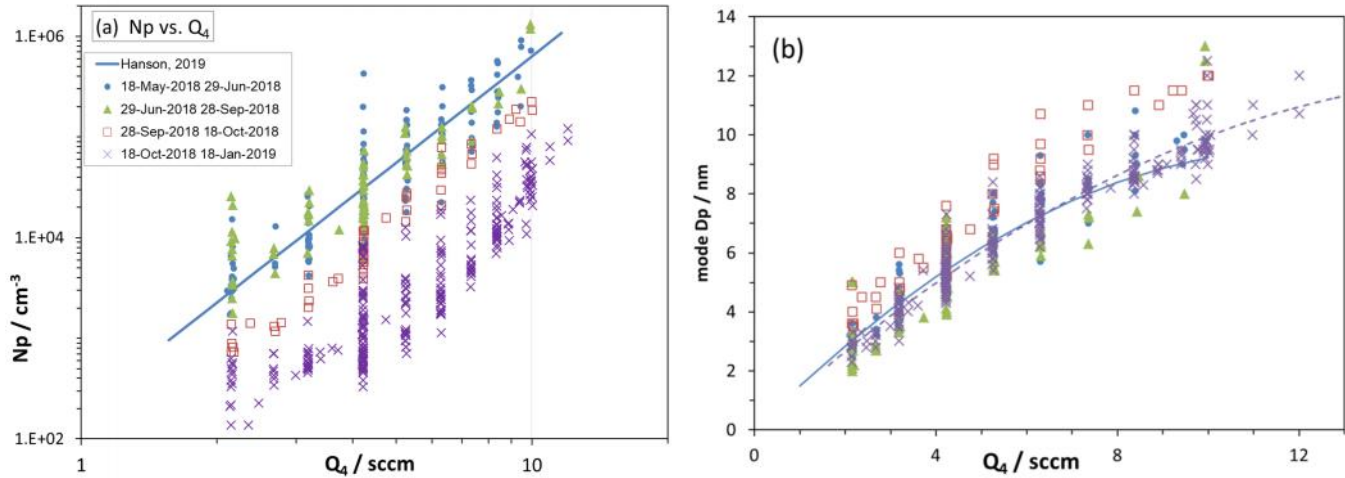

Fig. S7. Particle characteristics, (a)  $N_p$  and (b) mode diameter, of the leading edge mode from the DEG system vs.  $Q_4$ . Data for  $N_p$  in blue was published in Hanson et al. [2019]; a new quadratic fit to the mode diameter for this period is included as the blue line in (b). The latest set of data in (b) was also fit to a quadratic (purple dashed line); these fits are meant to facilitate comparison between the two time periods.

### S1.5 Sensitivity to room temperature.

An example of an incident where a fluctuation in the temperature sensor mounted on the top cone ( $T_{cone}$ , red line) affected the UCPC count rates and the DEG system measurements (raw count rates for several voltages sent to the nano-DMA are shown). Fluctuations in this temperature of  $0.4\text{ }^\circ\text{C}$  result in noticeable changes in the count rates for both the UCPC and DEG system.

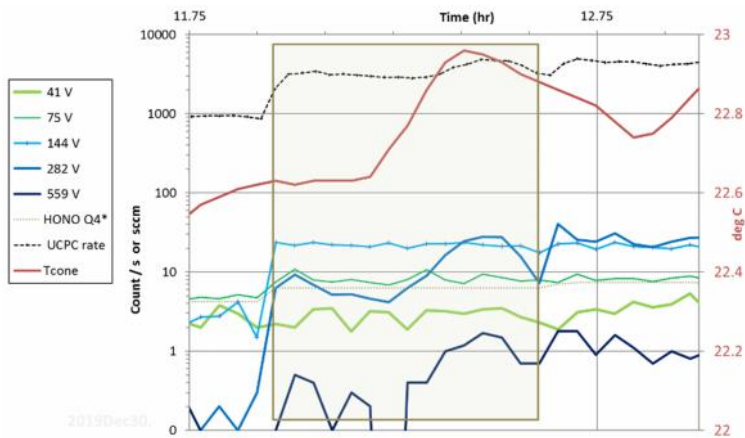

Fig. S8. Plots of particle detector count rates (left axis) and  $T_{\text{cone}}$  (right axis) vs. time. The gold box highlights the data while  $Q_4$  was constant at 6.3 sccm. The first five labels in the legend are the DEG count rates at selected voltages (the labels) sent to the nanoDMA, the UCPC count rate is the dashed black line.

Attempts to induce effects on  $N_p$  by intentionally varying  $T_{\text{cone}}$  were not conclusive. We think changes in  $T_{\text{cone}}$  are a proxy for changes in the temperature of the room that may have affected the temperature of other parts of the apparatus, such as the reservoirs and delivery lines for the HONO source.

### S1.6 $\text{NO}_x$ and NO measurements.

Shown in Fig. S9 are the mixing ratios of  $\text{NO}_x$  and the percent as NO in the HONO source flow,  $Q_4$ . There is quite a bit of scatter in the NO fraction for the time period 05July2019 to 04Nov2019 with a relatively high average NO fraction of 20 % of the measured  $\text{NO}_x$ . Late in the day 04Nov2019, the  $\text{NaONO}(s)$  was replaced and the vessel holding it was swapped out for a smaller vessel. The measurements after that generally had lower NO levels presumably due to less HONO decomposition. The DEG CPC became increasingly noisy in the first four months of 2020 and it was replaced with a second butanol-based CPC system in May of 2020 (the filled red squares in the figure). This CPC system is known to efficiently detect 3 nm and larger particles [Kangasluoma et al. 2014].

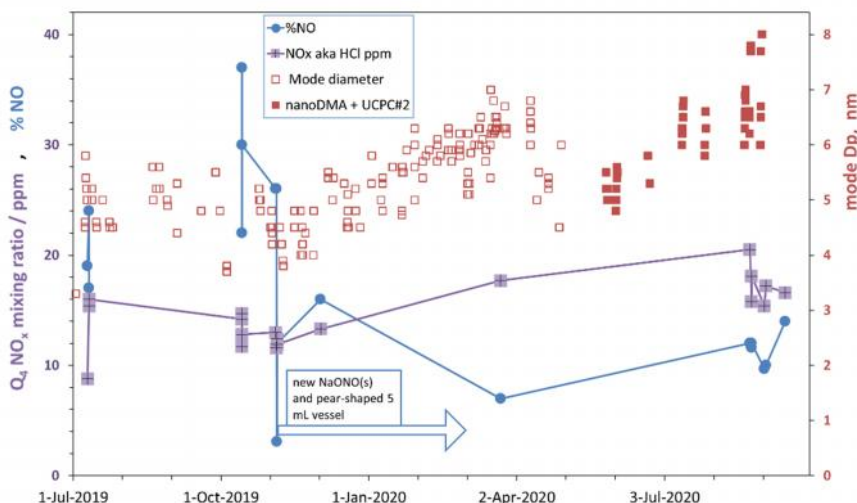

Fig. S9.  $\text{NO}_x$  and NO measurements and the mode diameter of nanoparticles formed in nucleation experiments as a function of time. Nucleation baseline conditions of  $Q_4 = 4.2$  sccm, 52 % RH, 296 K. Over the period Jul to Dec 2019,  $\text{NO}_x$  was on average 13 ppmv and NO was 23 % of that while from Mar2020 to Sep2020  $\text{NO}_x$  averaged 17 ppmv and NO was on average 11 % of that. Note that the DEG  $N_p$  over the time periods Jul2019-Dec2019 (Fig. 1) and Jan2020-Apr2020 (Fig. S3) was about  $1500 \text{ cm}^{-3}$ . The DEG CPC was replaced with a butanol CPC in the month of May, 2020.

## S2. Models.

The model was presented in Hanson et al. [2019] and here significant changes in parameters are detailed. The main differences are in the HONO and NO levels. The most recent measurements of the HCl mole fraction of  $Q_4$  is 17 ppbv (albeit with excursions from this value, see Fig. S9) which was taken from the  $NO_x$  measurements (such as Fig. 2); we had estimated 15 ppbv previously. The NO level is taken from measurements such as shown in Fig. 2;  $NO_2$  is taken to be equal to NO and HONO is summarily reduced. The inclusion of initial NO levels from the HONO source is the most consequential difference with our previous model calculations.

No longer included is a reaction between  $HO_2$  and  $SO_2$ . It had been invoked to explain the dependence of  $N_p$  on  $SO_2$  level in our previous work. This reaction added 10-15 % to the simulated  $H_2SO_4$  production rate. Interestingly, with the inclusion of small amounts of NO and  $NO_2$  coming from the HONO source, the model (either binary or with low levels of added base, Fig. S6) shows a significant dependence on  $SO_2$  level which may be due to  $SO_2$  competing with NO and  $NO_2$  for OH.

There are a few other model details worth re-iterating here. When a base is added, it is constrained to the middle 25 % of the mass-flow (middle fake) to mimic the elevated concentration of the base in the sidearm flow in the experiment. All temperatures are 296 K and laminar flow is assumed.  $N_p$  is taken to be the sum of all the truncation clusters at  $Z=125$  cm and  $R = 0$  when clusters were limited to 10 or fewer SA molecules; when growth to larger clusters was simulated,  $N_p$  is the sum of all clusters of 10 or more SA molecules.

### S2.1 Verification of box-model

In this section we provide a comparison of our model to the nucleation rates from the ACDC model (McGrath et al. 2011) published in Kürten et al. [2016] when 100 pptv of  $NH_3$  is present.

With the thermodynamics set to those of Ortega et al [2012] (with corrigendum for 4a, 3b cluster) and allowing clusters containing 5 sulfuric acid molecules to accumulate, we calculated the nucleation rate,  $J_{\text{box } 5}$ , of 5 acid clusters. This approach will mimic the nucleation rate used for the ACDC model where the 5a4b and 5a5b clusters were considered stable (the distribution is dominated by these clusters). Please see Hanson et al. [2017] (DOI: 10.1021/acs.jpca.7b00252) section 2.4 and in its supplement S2.1 and S2.4 for additional information on the 0-D (box) model.

Three representative points along the neutral ACDC data presented in Kürten et al. [2016] (green solid line, 278 K, 100 pptv  $NH_3$ ) were simulated with our box model and the results are compared in Table S1. Results were also obtained for larger sets of clusters:  $J_{\text{box } 6}$  and  $J_{\text{box } 8}$ , see below.

Table S1. Comparison of Box Model nucleation rates with ACDC using Ortega et al. [2012]  $NH_3$ - $H_2SO_4$  thermodynamics, 278 K and 100 pptv  $NH_3$ .

| $[H_2SO_4]$<br>( $cm^{-3}$ ) | $J_{\text{ACDC}}$ | $J_{\text{box } 5}$<br>( $cm^{-3} s^{-1}$ ) | $J_{\text{box } 6}$ | $J_{\text{box } 8}$ |
|------------------------------|-------------------|---------------------------------------------|---------------------|---------------------|
| $9 \times 10^6$              | 1.0               | 1.2                                         | 0.16                | 0.016               |
| $1.8 \times 10^7$            | 10                | 12                                          | 4.4                 | 1.5                 |
| $3.8 \times 10^7$            | 100               | 112                                         | 77                  | 62                  |



165 At 278 K, evaporation rates of the 5a clusters are significant and this leads to large decreases in the nucleation rates as  
the size of the system is allowed to increase. The H<sub>2</sub>SO<sub>4</sub> content of the accumulation cluster is indicated in the  
subscripts 5 6 8 in the column titles in Table S1. This was accomplished by assuming a reasonable set of free energies for  
the 5a 1-5b clusters, thus in the J<sub>box 6</sub> and J<sub>box 8</sub> calculations, they can evaporate with the accumulation clusters set to all  
170 the 6a and 8a clusters (J<sub>box 8</sub> also allows 6a and 7a clusters to evaporate). The box model nucleation rates for the 6a  
accumulation clusters, J<sub>box 6</sub>, decrease by 32, 64 and 86 % from J<sub>box 5</sub> for the three different levels of H<sub>2</sub>SO<sub>4</sub>, respectively,  
shown in Table S1. The trend continues as the thermodynamics are further extrapolated allowing for larger  
accumulation clusters and J<sub>box 8</sub> rates decrease another 20, 65, and 90 % from J<sub>box 6</sub>.

This clearly indicates that the Ortega et al. [2012] NH<sub>3</sub>-H<sub>2</sub>SO<sub>4</sub> clusters are not large enough for many experimental  
conditions, particularly for simulations at 278 K and warmer and low sulfuric acid levels. For simulations at 292 K and  
175 100 ppt NH<sub>3</sub> and SA at 1x10<sup>8</sup> cm<sup>-3</sup>, the J<sub>box 5</sub> nucleation rate is 10.1 cm<sup>-3</sup> s<sup>-1</sup> which agrees with ACDC as presented in  
Kürten et al. Extending the thermodynamics and calculating J<sub>box 6</sub> as above, the nucleation rate falls to 1.6 cm<sup>-3</sup> s<sup>-1</sup>, which  
is an 85 % decrease. In fact, one of the main points of our Measurement Report is that the thermodynamics of clusters  
that contain up to ten acid molecules are needed for describing nucleation in the NH<sub>3</sub>-H<sub>2</sub>SO<sub>4</sub>-H<sub>2</sub>O system.

### S3. Growth rate calculation.

180 Sulfuric acid-water nanoparticles' composition is predicted to vary with size (see Table S3 below, Liquid Drop Model  
[Lovejoy et al. 2004; Yu et al. 2005]) and therefore the Verheggen and Mozurkewich [2002] approach, where the  
particle's volume is differentiated with respect to time, is a good starting point. After we modify it by including some  
terms and rearranging it, we will integrate it from 2.2 to 8.7 nm (geometric or mass diameter.) This equation is readily  
185 modified to account for the vapor molecule's size (parenthetical term in S1) and for the particle-vapor reduced mass (in  
the mean molecular speed  $\bar{c}_r$ ) (see Nieminen et al. [2010] for a similar modification). Many variables are then  
incorporated into a collision rate coefficient k<sub>GR</sub>.

$$\frac{dD_p}{dt} = \frac{M_{SA}\alpha\bar{c}_r[SA^*]}{N_A 2w\rho} \left(1 + \frac{d_{vapor}}{D_p}\right)^2 - \frac{D_p}{3} \frac{d \ln w\rho}{dt} \quad (S1)$$

$$= k_{GR}[SA^*] - \frac{D_p}{3} \frac{\partial \ln w\rho}{\partial D_p} \frac{dD_p}{dt} - \frac{D_p}{3} \frac{\partial \ln w\rho}{\partial RH} \frac{dRH}{dt} \quad (S2)$$

190 Here, D<sub>p</sub>, w and ρ are the particle's diameter, SA (sulfuric acid) weight fraction, and density, respectively; M<sub>SA</sub> is SA's  
molar mass, N<sub>A</sub> is Avogadro's number, α and  $\bar{c}_r$  are the mass accommodation coefficient of SA and mean molecular  
speed (using the reduced mass, taking into account hydration, Hanson and Eisele [2000]; about 2 water molecules at 52  
% RH), [SA\*] is the concentration of SA molecules and its hydrates, and d<sub>vapor</sub> is the average diameter of hydrated SA  
molecules, 0.64 nm. Note that  $\bar{c}_r$  calculated using the reduced mass of the particle-SA\* collision for a particle diameter  
of 2.2 nm is only 1.35 % greater than the mean molecular speed of SA<sub>1</sub>W<sub>2</sub>. k<sub>GR</sub> subsumes all the parameters besides  
195 [SA\*] in the first term of the RHS of the top line.

$$k_{GR} = \frac{M_{SA}\alpha\bar{c}_r}{N_A 2w\rho} \left(1 + \frac{d_{vapor}}{D_p}\right)^2 \quad (S2b)$$

Solving for dD<sub>p</sub>/dt for these conditions yields:

$$\frac{dD_p}{dt} = \frac{k_{GR}[SA^*] - \frac{D_p}{3} \frac{\partial w\rho}{\partial RH} \frac{dRH}{dt}}{1 + \frac{D_p}{3} \frac{\partial \ln w\rho}{\partial D_p}} \quad (S3)$$

The last term in the numerator is zero for experiments at constant RH and

$$\frac{dD_p}{dt} = \frac{k_{GR}[SA^*]}{1 + \frac{D_p}{3} \frac{\partial \ln w_p}{\partial D_p}} \quad (S4)$$

While  $k_{GR}$  accounts for uptake due to SA molecules it also accounts for water molecules taken up in addition to those attached to the SA molecule, determined by the nanoparticle's composition and density. The denominator accounts for additional water molecules taken up as the particle's composition changes with size. For the present conditions, this latter effect is about 8 % over the 3 to 8 nm range (i.e., the denominator is 0.92). See Table S2 below for representative values for the size dependent terms.

Splitting the growth from 2.2 to 8.7 nm into three time intervals  $\Delta t_i$  of 7.5 s to obtain an average value for  $k_{GR}/\text{denominator}$  of  $3.38 \times 10^{-11} \text{ nm cm}^3/\text{s}$ , an average  $\text{H}_2\text{SO}_4$  concentration is estimated from equation (S4)

$$[SA^*]_{\text{ave}} = 6.5 \text{ nm} / (22.5 \text{ s} * 3.38 \times 10^{-11} \text{ nm.cm}^3/\text{s}) = 8.55 \times 10^9 \text{ cm}^{-3}.$$

When the photolysis rate was set to  $4.0 \times 10^{-4} \text{ s}^{-1}$ , the average on-axis [SA] calculated for these conditions ( $\text{NO}_x$  of 24.6 ppbv with 80 as HONO and 10 % for both NO and  $\text{NO}_2$ ) is  $8.56 \times 10^9 \text{ cm}^{-3}$ . The calculated profile is shown in Fig. 3 in the main paper and S11 below.

More rigorously, using the  $\text{H}_2\text{SO}_4$  concentrations on-axis shown in Fig. S11 below (blue +) and calculating  $\Delta D_p = \sum (dD_p/dt)_i \Delta t_i$  from  $i=1$  to 3 using the values in rows 2, 3 and 5 in Table S2, we get an increase in diameter of 6.4 nm. This calculation also indicates that the growth experiments are consistent with a photolysis rate for HONO of  $4 \times 10^{-4} \text{ s}^{-1}$ .

Table S2. Size dependent parameters in equation (S4).  $\text{H}_2\text{SO}_4$  weight fraction is  $w$ ,  $k_{GR}$  from eq. S2b. The calculation of  $\Delta D_p$ :  $7.5 * (3.30 \times 10^{-11} * 1.077 * 2.4 \times 10^9 + 3.13 \times 10^{-11} * 1.094 * 8.7 \times 10^9 + 3.08 \times 10^{-11} * 1.058 * 1.42 \times 10^{10})$ .

| $D_p$<br>(nm) | $w$  | ... (g/cm <sup>3</sup> ) | $w_{\dots}$ | $k_{GR}$ (10 <sup>-11</sup> nm<br>cm <sup>3</sup> /s) | 1/denomi<br>nator (S4) | Est. time<br>(s) | Ave. [H <sub>2</sub> SO <sub>4</sub> ] / cm <sup>-3</sup><br>In time interval |
|---------------|------|--------------------------|-------------|-------------------------------------------------------|------------------------|------------------|-------------------------------------------------------------------------------|
| 2.2           | 0.58 | 1.47                     | 0.85        | 3.44                                                  |                        | 0                |                                                                               |
| 3.3           | 0.54 | 1.44                     | 0.78        | 3.30                                                  | 1.077                  | 7.5              | 2.4e9                                                                         |
| 5.0           | 0.51 | 1.40                     | 0.71        | 3.13                                                  | 1.094                  | 15               | 8.7e10                                                                        |
| 7.7           | 0.48 | 1.38                     | 0.66        | 3.11                                                  | 1.08                   | ~19              |                                                                               |
| 8.7           | 0.47 | 1.375                    | 0.65        | 3.08                                                  | 1.058                  | 22.7             | 1.42e10                                                                       |
| 10.0          | 0.47 | 1.37                     | 0.64        | 3.06                                                  |                        |                  |                                                                               |

It is reasonable to suggest that a more appropriate measure of the particles' exposure to  $\text{H}_2\text{SO}_4$  is the mixing-cup concentration: a flow-weighted average over the region sampled by the DEG system, 2 L/min. Assuming the DEG system samples the middle of the flow, this region covers radii from 0 to 1.4 cm. Shown in Fig. S10 are (a) the radial distributions of [H<sub>2</sub>SO<sub>4</sub>] at four axial distances and (b) the mixing cup and on-axis [H<sub>2</sub>SO<sub>4</sub>]. Averaged from 0 to 120 cm, the mixing-cup concentration is about 10% less than the on-axis concentration. However, the flow slows with distance off centerline: for example, at 1 cm radius, the flow speed is 15 % less than on the centerline. This longer exposure time compensates somewhat for decreases in [H<sub>2</sub>SO<sub>4</sub>] as R increases.

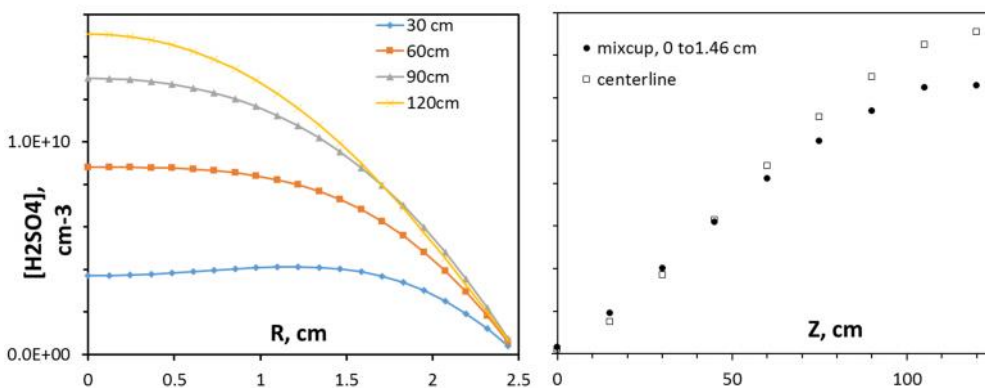

Fig. S10. Simulated  $[H_2SO_4]$  at  $Q_4 = 4.2$  sccm. (a) Radial distributions at a few axial distances. Note that the data for  $Z = 120$  cm is 11 cm beyond the simulation's lighted section. (b) Mixing-cup concentration and on-axis (centerline) concentrations plotted vs. axial distance.

#### S4. Previous determination of $H_2SO_4$ concentration: Photolysis rate, dependence on $Q_4$ , etc.

Isoprene and methylvinylketone/methacrolein measurements were used to estimate the amount of HONO oxidized in our previous work [Hanson et al. 2019], however, the presence of 10 % NO was not considered. Again, the other differences are: (i) a level of 15 ppmv for the HCl-in- $N_2$  flow was estimated in our earlier work, (ii) also included was a reaction between  $HO_2$  and  $SO_2$  that yielded  $H_2SO_4$  and an additional OH molecule and (iii) the HONO photolysis rate was larger. The HONO photolysis rate was estimated from absorption measurements along with isoprene photo-oxidation experiments, from the relative amount of methylvinylketone and methacrolein produced per isoprene lost. The precision of the absorption measurement was low yet the presence of  $NO_2$  was posited, though not well quantified, due to HONO decomposition we believed to be take place in the absorption apparatus. Detection of NO was not attempted at that time. The presence of 10% NO is the reason for the large change in the estimate of the photolysis rate. The difference in the average  $H_2SO_4$  between the simulation then and the present simulations is only 14 %, within the uncertainties of the measurements and in the branching ratios of isoprene's dominant photo-oxidation pathways.

##### S4.1 Calculated $H_2SO_4$ for previous conditions

The green asterisks in Fig. S11 are simulated  $H_2SO_4$  using the previous parameters from Hanson et al. [2019]. These values differ from the present: 15 ppm HCl level in  $Q_4$ , no initial NO from the HONO generator, a photolysis rate of  $8 \times 10^{-4} s^{-1}$ , and a reaction between  $HO_2$  and  $SO_2$  was assumed to occur. The  $[H_2SO_4]$  averaged along the length of the reactor is  $7.36 \times 10^9 cm^{-3}$ , about 14 % less than that of the current simulation (blue +).

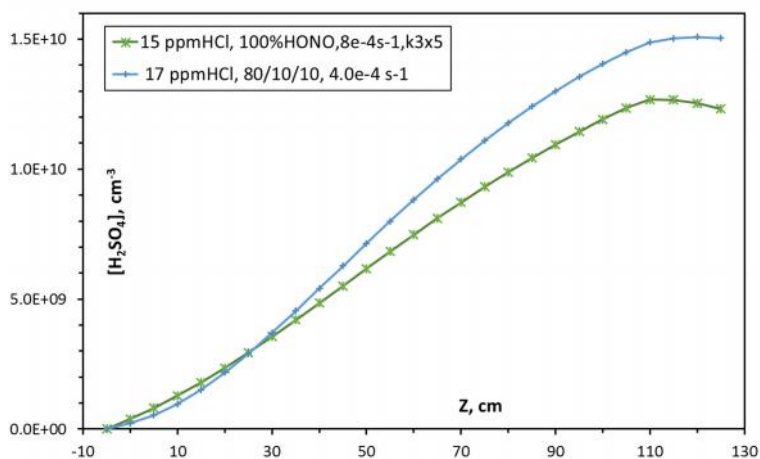

Fig. S11. Comparing  $Q_4 = 4.2$  sccm on-axis  $H_2SO_4$  concentrations simulated with previous parameters (green) [Hanson et al. 2019] and the present ones (blue) where  $NO_x$  is slightly enhanced, 10 % of that enters as NO and as  $NO_2$ , and there is no reaction for  $HO_2$  with  $SO_2$  ( $k_3 \times 5$ ). The average on-axis  $[H_2SO_4]$  from  $Z=0$  to 125 cm for these simulations are (blue)  $8.56 \times 10^9 cm^{-3}$  and (green)  $7.36 \times 10^9 cm^{-3}$ .

265 S5. Plots of modeled H<sub>2</sub>SO<sub>4</sub> vs. experimental conditions.

Shown in Fig. S12 are simulated H<sub>2</sub>SO<sub>4</sub> (on-axis values) at 60 cm and averaged over the length of the reactor plotted vs. Q<sub>4</sub>. Both quantities are described well by a linear relationship however they have significant intercepts. That they are not strictly proportional to Q<sub>4</sub> is a consequence of changes in the [H<sub>2</sub>SO<sub>4</sub>] profiles with Q<sub>4</sub>.

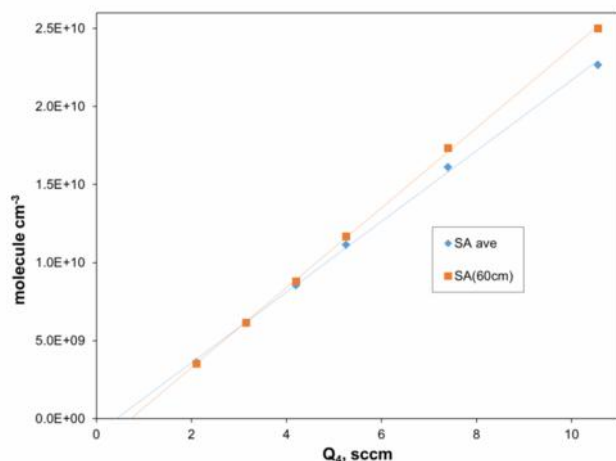

Fig. S12. Modeled on-axis [H<sub>2</sub>SO<sub>4</sub>] vs. Q<sub>4</sub>/sccm. Average value over the length of the reactor and the H<sub>2</sub>SO<sub>4</sub> concentrations at 60 cm are shown. The linear fits are SA<sub>ave</sub> = 2.26x10<sup>9</sup>\*Q<sub>4</sub> - 9.46x10<sup>8</sup> and SA(60cm) = 2.56\*10<sup>9</sup>\*Q<sub>4</sub> - 1.83x10<sup>9</sup> for SA in molecule cm<sup>-3</sup> and Q<sub>4</sub> in sccm.

285 S6. Composition of the nano-particles.

We used the liquid drop model calculations of Lovejoy et al. [2004] to obtain the composition of aqueous sulfuric acid nano-droplets as a function of size for 296 K and 52 % RH. These are shown in Table S3 along with the 298 K and 50 % RH data from Fig. 2 of Yu [2005] for comparison. Note that bulk densities that corresponded to the composition of the nanoparticles were assumed to apply to the nanoparticles. The mass diameter is about 0.3 nm smaller than the mobility diameter according to Larriba et al. [2010].

**Table S3.** Compositions of H<sub>2</sub>SO<sub>4</sub>-H<sub>2</sub>O clusters from SAWNUC [Lovejoy et al. 2004] and Yu [2005] for 52 % RH and 296 K. Bulk density ρ from CRC [1979], D<sub>mass</sub> is mass diameter, k<sub>f</sub> is the forward rate coefficient for addition of the doubly hydrated H<sub>2</sub>SO<sub>4</sub> (SA) molecule indexed for product cluster. The volume of the clusters, V, as a function of # of SA molecules is given closely by: V / cm<sup>3</sup> = 1.276x10<sup>-22</sup>(#SA)<sup>1.115</sup>.

| # SA | Pk. # W SAWNUC <sup>a</sup> | Fastest SA evap. <sup>b</sup> | # W, Yu <sup>c</sup> | wt.% | ... / (g/cm <sup>-3</sup> ) <sup>d</sup> | D <sub>mass</sub> / nm | k <sub>f</sub> / cm <sup>-3</sup> s <sup>-1</sup> | k <sub>f</sub> / cm <sup>-3</sup> s <sup>-1</sup> 'old' <sup>e</sup> | D <sub>c</sub> / atm cm <sup>2</sup> s <sup>-1</sup> f |
|------|-----------------------------|-------------------------------|----------------------|------|------------------------------------------|------------------------|---------------------------------------------------|----------------------------------------------------------------------|--------------------------------------------------------|
| 1    | 1.5                         | -                             | 1.2                  | 78.4 | 1.71                                     | <b>0.62</b>            | -                                                 | -                                                                    | 0.076                                                  |
| 2    | 4                           | 2                             | 3                    | 73.1 | 1.65                                     | <b>0.80</b>            | 3.88E-10                                          | 4.95E-10                                                             | 0.057                                                  |
| 3    | 7                           | 4.5                           | 5                    | 71.5 | 1.63                                     | <b>0.93</b>            | 4.39E-10                                          | 5.47E-10                                                             | 0.0493                                                 |
| 4    | 10.5                        | 7.5                           | 8.5                  | 69.6 | 1.61                                     | <b>1.04</b>            | 4.92E-10                                          | 6.02E-10                                                             | 0.0418                                                 |
| 5    | 14                          | 10.5                          | 11                   | 67.7 | 1.58                                     | <b>1.14</b>            | 5.43E-10                                          | 6.55E-10                                                             | 0.0368                                                 |
| 6    | 17.5                        | 14                            | 14                   | 65.8 | 1.56                                     | <b>1.22</b>            | 5.91E-10                                          | 7.03E-10                                                             | 0.0330                                                 |
| 7    | 21                          | 17.5                          |                      | 64.5 | 1.55                                     | <b>1.30</b>            | 6.37E-10                                          | 7.49E-10                                                             | 0.0302                                                 |
| 8    | 25                          | 21                            | 21                   | 63.5 | 1.54                                     | <b>1.37</b>            | 6.80E-10                                          | 7.93E-10                                                             | 0.0279                                                 |
| 9    | 28.5                        | 25                            |                      | 62.8 | 1.53                                     | <b>1.43</b>            | 7.22E-10                                          | 8.34E-10                                                             | 0.0260                                                 |
| 10   | 32                          | 28.5                          | 28                   | 62.6 | 1.52                                     | <b>1.49</b>            | 7.62E-10                                          | 8.74E-10                                                             | 0.0244                                                 |
| 20   | 74                          | 70                            | 65                   | 59.5 | 1.50                                     | <b>1.92</b>            | 1.11E-09                                          | 1.21E-09                                                             | 0.0159                                                 |
| 30   | 120                         | 115                           | 105                  | 57.6 | 1.47                                     | <b>2.23</b>            | 1.40E-09                                          | 1.47E-09                                                             | 0.0123                                                 |
| 40   | 168                         | 163                           | 170                  | 56.4 | 1.45                                     | <b>2.48</b>            | 1.66E-09                                          | 1.71E-09                                                             | 0.0102                                                 |
| 50   | 217                         | 212                           | 195                  | 55.6 | 1.44                                     | <b>2.69</b>            | 1.89E-09                                          | 1.91E-09                                                             | 0.00883                                                |

|          |                            |     |     |      |      |             |          |          |         |
|----------|----------------------------|-----|-----|------|------|-------------|----------|----------|---------|
| 100      | 479                        | 474 | 420 | 53.2 | 1.42 | <b>3.46</b> | 2.90E-09 | 2.78E-09 | 0.00557 |
| 150      | 755                        |     |     | 52.0 | 1.41 | <b>4.00</b> | 3.76E-09 | 3.48E-09 | 0.00424 |
| 200      | 1042                       |     |     | 51.1 | 1.40 | <b>4.44</b> | 4.53E-09 | 4.09E-09 | 0.00348 |
| 300      | 1631                       |     |     | 50.5 | 1.39 | <b>5.13</b> | 5.91E-09 | 5.16E-09 | 0.00263 |
| $\infty$ | #W / #SA = 7.5 in the bulk |     |     | 42.1 | 1.32 | -           | -        | -        | -       |

290 <sup>a</sup> Most abundant hydrate, pseudo-steady state. <sup>b</sup> Hydrate with the largest SA evaporation rate. <sup>c</sup> The critical cluster for 50 % RH and 298 K, from Yu's Fig 2(a). <sup>d</sup> CRC [1970] for the bulk densities. <sup>e</sup> 'old': Hanson et al. [2019] also used the kinetic theory of McMurry [1980] but assumed the monomer and all clusters had the bulk composition: 42 wt. % or 7.5 H<sub>2</sub>O per H<sub>2</sub>SO<sub>4</sub>. <sup>f</sup> Diffusion coefficient using Mason and Monchick [1961,1962] with a collision integral factor ( $\Omega_{1,1}$ ) = 1.24.

## 295 S7. Cluster model and thermodynamics

The two phenomenological sets of cluster free energies considered here differ in their putative binary system thermodynamics, our previous set, NH3\_52 [Hanson et al. 2019], and the present set, NH3\_D52. At the limit of zero NH<sub>3</sub> lie the binary system thermodynamics and these and those given by SAWNUC [Lovejoy et al., 2004, 2009] at 52% RH (transformed into quasi-unary by weighting over the water distribution to get an average equilibrium constant for addition of H<sub>2</sub>SO<sub>4</sub>) are compared in Fig. S13. Fig. S14 shows predicted N<sub>p</sub> as a function of Q<sub>4</sub> for these three quasi-unary (zero ammonia) free energy schemes. NH3\_52 and SAWNUC for 52 % RH yield N<sub>p</sub> about one and two orders of magnitude greater than N<sub>p</sub> for NH3\_D52 which are close to the experimental data from Figure 5.

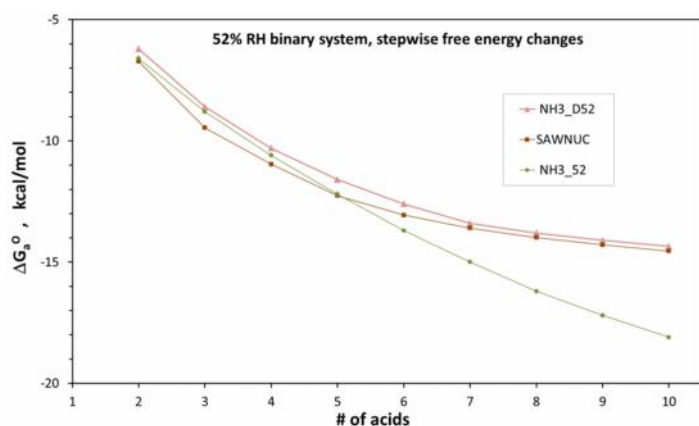

Fig. S13. Quasi-unary standard free energy changes for addition of H<sub>2</sub>SO<sub>4</sub> (hydrated) to n-1 cluster as a function of product cluster, n. NH3\_D52 is the binary set developed here, NH3\_52 from Hanson et al. [2019] and SAWNUC is from Lovejoy et al. [2004].

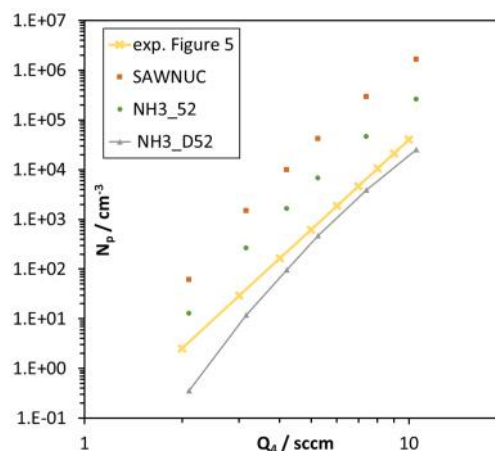

Fig. S14. Binary system, N<sub>p</sub> vs. Q<sub>4</sub>, modeled with three different thermodynamics. NO, NO<sub>2</sub> and HONO fractions were varied according to Figure 2. Thick yellow line represents lower envelope of data in Figure 5.

### S7.1 NH3\_D52 Gibbs energies and enthalpies for H<sub>2</sub>SO<sub>4</sub>-NH<sub>3</sub> clusters at 52 % RH.

Shown in Fig. S15 are the step-wise standard free energy changes for addition of an H<sub>2</sub>SO<sub>4</sub> molecule,  $\Delta G_a^0$ , for NH3\_52 (thin lines) and NH3\_D52 (thick lines). Product clusters are indexed with the number of H<sub>2</sub>SO<sub>4</sub> molecules along the X-axis and number of ammonia molecules color-coded. These two schemes are close in  $\Delta G_a^0$  up to the 5 H<sub>2</sub>SO<sub>4</sub> clusters; larger clusters (more NH<sub>3</sub> or more H<sub>2</sub>SO<sub>4</sub>) reveal that NH3\_D52 has weaker bonding than does NH3\_52, due in large part to the prescription that the large clusters with few ammonia molecules approach the quasi-unary free energy for the binary system.

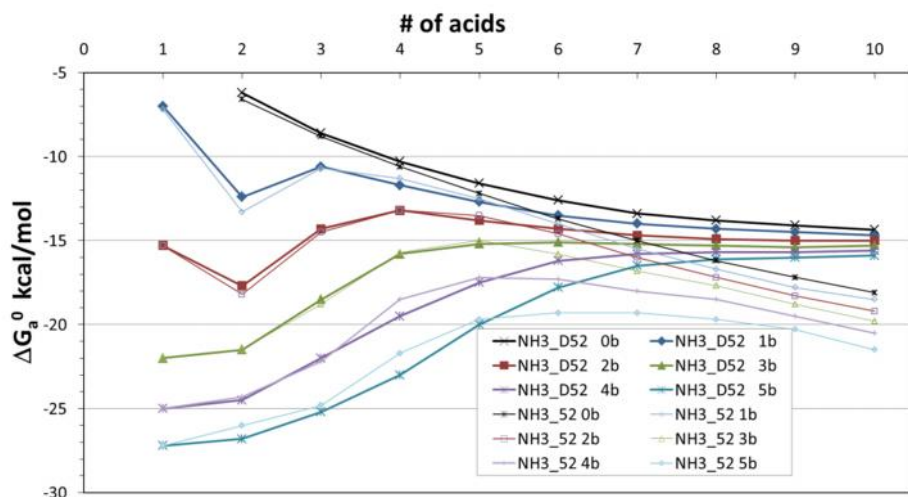

Fig S15. Comparison of NH3\_D52 (thick lines) and NH3\_52 (thin lines) thermodynamics, step-wise free energy changes for adding an acid molecule (binary is designated '0 b').  $\Delta G_a^0$  for 1 acid binary is taken to be 0. The number of ammonia molecules in the cluster also indicated by color.

In the following tables, the free energies and enthalpies for  $\text{NH}_3\text{-H}_2\text{SO}_4$  clusters at 53 % RH and 298 K are presented.

Table S4. Cluster Gibbs energies (298 K) as a function of # of sulfuric acids (columns) and # of ammonias (rows), kcal/mol.

|   | 0    | 1     | 2     | 3     | 4     | 5      | 6      | 7      | 8      | 9      | 10      |
|---|------|-------|-------|-------|-------|--------|--------|--------|--------|--------|---------|
| 0 | 0    | 0     | -6.2  | -14.8 | -25.1 | -36.7  | -49.3  | -62.7  | -76.5  | -90.6  | -104.95 |
| 1 | 0    | -7    | -19.4 | -30   | -41.7 | -54.4  | -67.9  | -81.9  | -96.2  | -110.7 | -125.4  |
| 2 | 4    | -11.3 | -29   | -43.3 | -56.5 | -70.3  | -84.6  | -99.3  | -114.2 | -129.2 | -144.2  |
| 3 | 8    | -14   | -35.5 | -54   | -69.8 | -85    | -100.1 | -115.3 | -130.6 | -146   | -161.3  |
| 4 | 9.5  | -15.5 | -40   | -62   | -81.5 | -99    | -115.2 | -131   | -146.7 | -162.4 | -178    |
| 5 | 10.7 | -16.5 | -43.3 | -68.5 | -91.5 | -111.5 | -129.3 | -145.8 | -161.9 | -177.9 | -193.8  |
| 6 | 11.9 | -17.5 | -46   | -73.6 | -99   | -121.9 | -142   | -159.8 | -176.7 | -193   | -209.3  |

Table S5. Enthalpies (kcal/mol) as a function of # of sulfuric acids (columns) and # of ammonias (rows)

|   | 0     | 1     | 2      | 3      | 4     | 5     | 6      | 7      | 8      | 9      | 10     |
|---|-------|-------|--------|--------|-------|-------|--------|--------|--------|--------|--------|
| 0 | 0     | 0     | -16.3  | -37.3  | -59.8 | -83.8 | -108.8 | -134.8 | -161.8 | -189.8 | -218.8 |
| 1 | 0     | -14   | -40    | -63.5  | -87   | -111  | -136   | -162.0 | -189.0 | -217.0 | -246.0 |
| 2 | 0.4   | -26   | -57    | -86    | -112  | -137  | -163   | -189.5 | -217.0 | -245.5 | -275.0 |
| 3 | -4.4  | -36   | -73    | -106.5 | -136  | -161  | -187   | -215.0 | -244.0 | -272.5 | -302.0 |
| 4 | -8.3  | -46.3 | -85    | -122   | -156  | -183  | -210   | -238.0 | -267.0 | -297.0 | -327.0 |
| 5 | -12.2 | -53   | -94    | -134   | -171  | -203  | -232   | -261.0 | -291.0 | -321.0 | -352.0 |
| 6 | -16.1 | -59.5 | -101.5 | -144   | -183  | -220  | -252   | -282.0 | -313.0 | -344.0 | -376.0 |

### S8. Ion calculations and discussion.

The Froyd et al. data covers up to 6  $\text{H}_2\text{SO}_4$  ligand molecules on the bisulfate ion and also has energetics of hydration. We averaged over hydrates to obtain a quasi-unary equilibrium constant that yields the free energies for the negative ions.



The forward rate coefficient was taken to be  $2 \times 10^{-9} \text{ cm}^3 \text{ s}^{-1}$  for all clusters. The quasi-unary free energies were extended to 9  $\text{H}_2\text{SO}_4$  ligands by assuming no changes in the stepwise  $\Delta G$ . In the ion-mediated pathway, particles can also be formed when positive and negative ions recombine but for our conditions this was found to be negligible compared to the negative ion channel. Experimentally, these ions / charged particles will be affected / neutralized in the charger which will affect how the DEG system counts them while the UCPC system counts them regardless. The quasi-unary free energies for the negative ions are presented in Table S6.

Table S6. Quasi-unary Gibbs energies at 296 K and 52% RH. Ion energies from Froyd et al. SAWNUC (modified liquid drop) energies from Lovejoy et al. [2004]. n is that in  $(\text{HSO}_4^-)$ ,  $(\text{H}_2\text{SO}_4)_n$  or  $\text{H}_2\text{SO}_4 \cdot (\text{H}_2\text{SO}_4)_n$ .

| n, # of $\text{H}_2\text{SO}_4$ ligands | $\text{UG}^0$ , SAWNUC stepwise | Total standard free energy | Stepwise, bisulfate ion, Froyd et al. | Total, ion |
|-----------------------------------------|---------------------------------|----------------------------|---------------------------------------|------------|
| 0                                       | -                               | 0                          | -                                     | -          |
| 1                                       | -6.72                           | -6.72                      | -23.02                                | -23.02     |
| 2                                       | -9.46                           | -16.17                     | -17.03                                | -40.05     |
| 3                                       | -10.96                          | -27.14                     | -13.84                                | -53.88     |
| 4                                       | -12.26                          | -39.40                     | -11.70                                | -65.58     |
| 5                                       | -13.06                          | -52.46                     | -12.62                                | -78.20     |
| 6                                       | -13.60                          | -66.06                     | -13.08                                | -91.28     |
| 7                                       | -13.99                          | -80.04                     | -13                                   | -104.28    |
| 8                                       | -14.29                          | -94.33                     | -13                                   | -117.28    |
| 9                                       | -14.54                          | -108.88                    | -13                                   | -130.28    |

#### References not in main text:

- Handbook of Chemistry and Physics, 35<sup>th</sup> edition, Hodgman, C.S., Weast, R.C., Wallace, C.W. editors, Chemical Rubber Publishing Co., Cleveland, OH, 1953-1954.
- Kangasluoma, J., C. Kuang, D. Wimmer, M. P. Rissanen, K. Lehtipalo, M. Ehn, D. R. Worsnop, J. Wang, M. Kulmala, T. Petäjä: Sub-3 nm particle size and composition dependent response of a nano-CPC battery, *Atmos. Meas. Tech.*, 7, 689–700, 20141 [www.atmos-meas-tech.net/7/689/2014/](http://www.atmos-meas-tech.net/7/689/2014/) doi:10.5194/amt-7-689-2014
- Larriba, A., Hogan, C. and de Lamora, J.: The Mobility–Volume Relationship below 3.0 nm Examined by Tandem Mobility–Mass Measurement, *Aerosol Science and Technology*, 45, 453-467, 2010.
- Monchick, L.; Mason, E. A. The Transport Properties of Polar Gases. *J. Chem. Phys.* 1961, 35, 1676.
- Mason, E. A.; Monchick, L. Transport Properties of Polar-Gas Mixtures. *J. Chem. Phys.* 1962, 36, 2746.
- Nieminen, T., Lehtinen, K. E. J. and Kulmala, M.: Sub-10 nm particle growth by vapor condensation – effects of vapor molecule size and particle thermal speed, *Atmos. Chem. Phys.*, 10(20), 9773–9779, doi:10.5194/acp-10-9773-2010, 2010.
